# Supplementary material for: Rapid synthesis of uniform silicalite-1 zeolite via a micro-liquid film reactor-assisted approach
Source: Royal Society of Chemistry journal article supplement (doi:10.1039/d4re00556b), 2025-01-01
Supplement: d4re00556b1.pdf [file d4re00556b1.pdf]

## Supporting Information

### Rapid synthesis of uniform silicalite-1 zeolite via a micro-liquid film reactor-assisted approach

Jindong Ji, Hetong Wang, Guoli Fan\*, Minghao Zhao, and Feng Li \*

*State Key Laboratory of Chemical Resource Engineering, Beijing University of Chemical Technology, Beijing 100029, China*

\* Corresponding authors, Email: fangl@mail.buct.edu.cn; lifeng@mail.buct.edu.cn

#### Figures and Tables

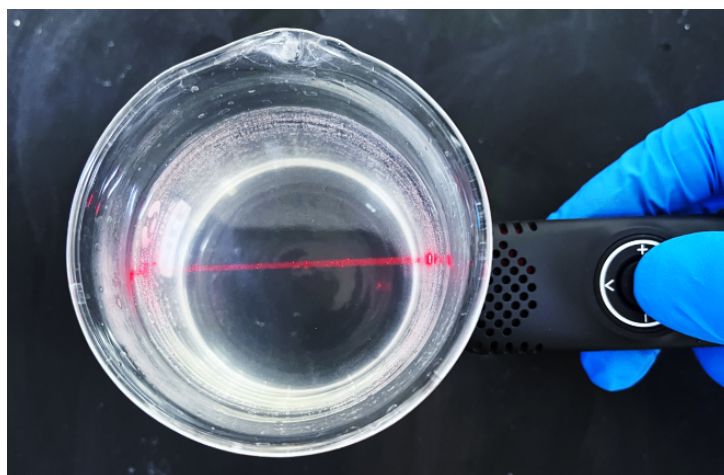

**Fig. S1** Photo for Tyndall effect of the zeolite precursor pretreated in MLF reactor for 10 min.

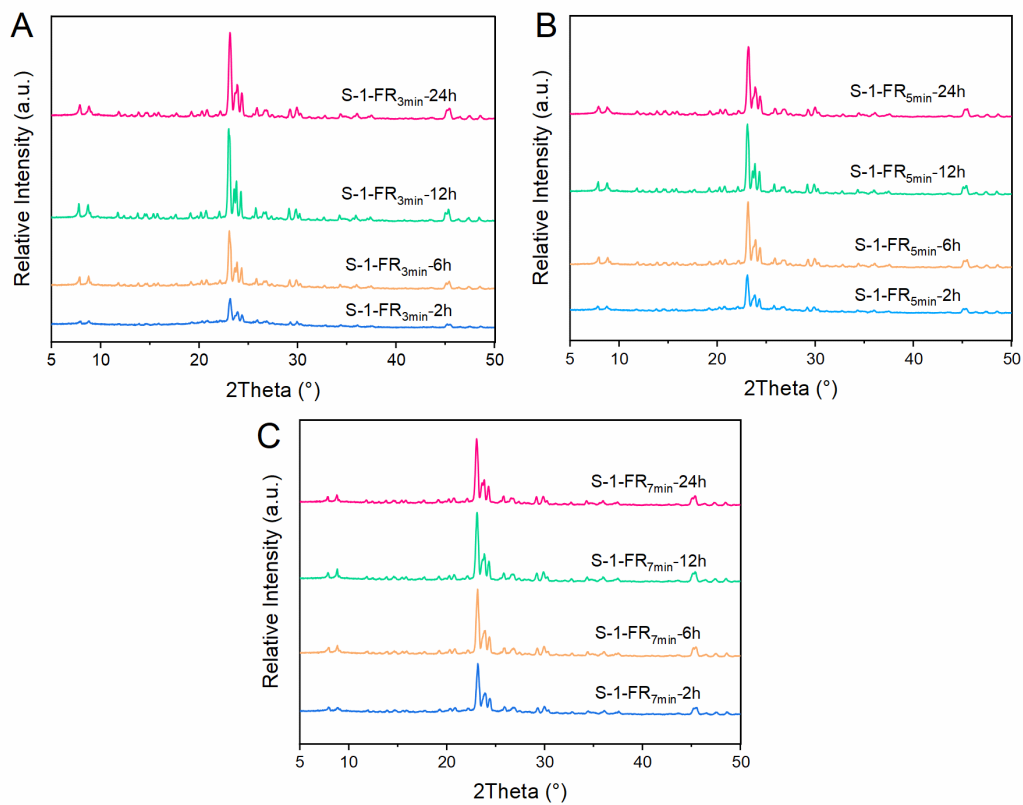

**Fig. S2** XRD patterns of samples derived from MLF reactor: (A) S-1-FR<sub>3min</sub>- $y$ , (B) S-1-FR<sub>5min</sub>- $y$ , (C) S-1-FR<sub>7min</sub>- $y$  ( $y=2, 6, 12, 24$  h).

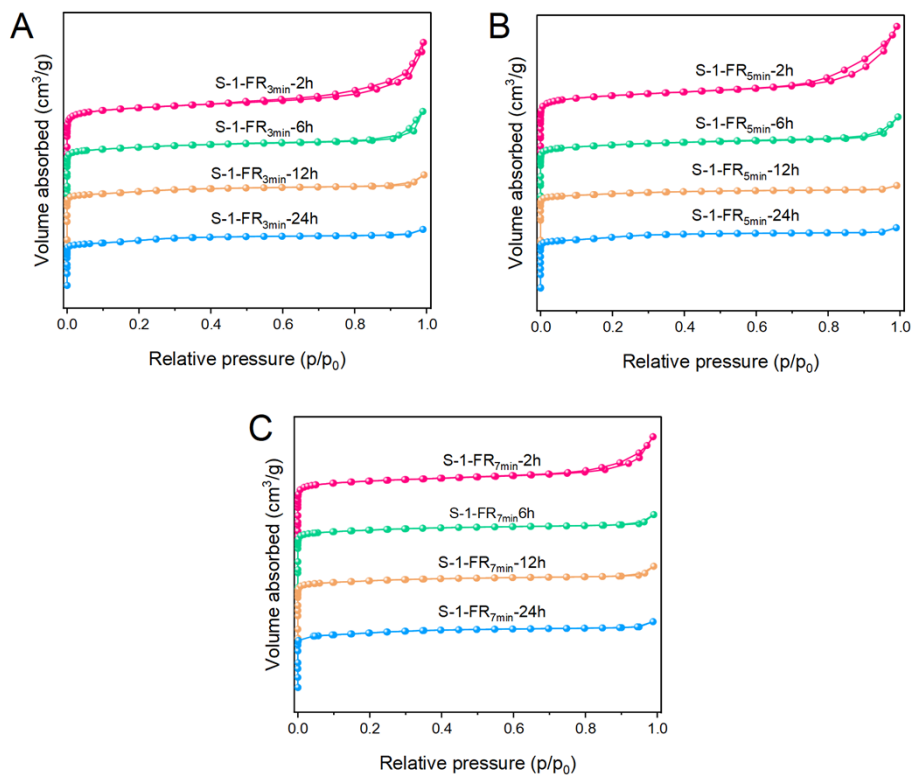

**Fig. S3** Nitrogen adsorption-desorption isotherms of S-1 zeolite samples derived from MLF reactor: (A) S-1-FR<sub>3min</sub>-y, (B) S-1-FR<sub>5min</sub>-y, (C) S-1-FR<sub>7min</sub>-y (y=2, 6, 12, 24 h).

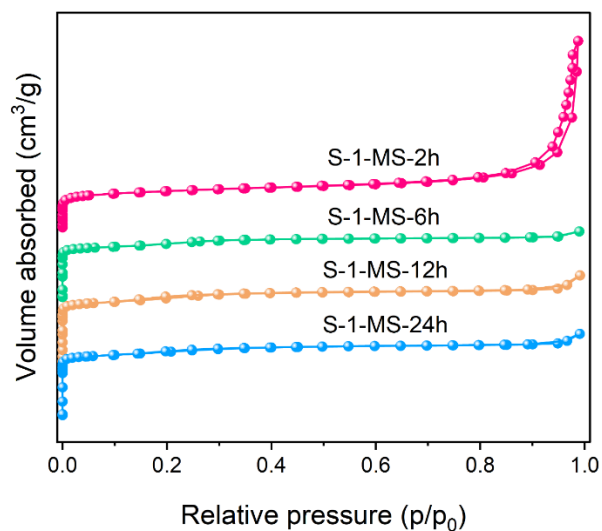

**Fig. S4** Nitrogen adsorption-desorption isotherms of S-1-MS-y samples (y=2, 6, 12, 24 h).

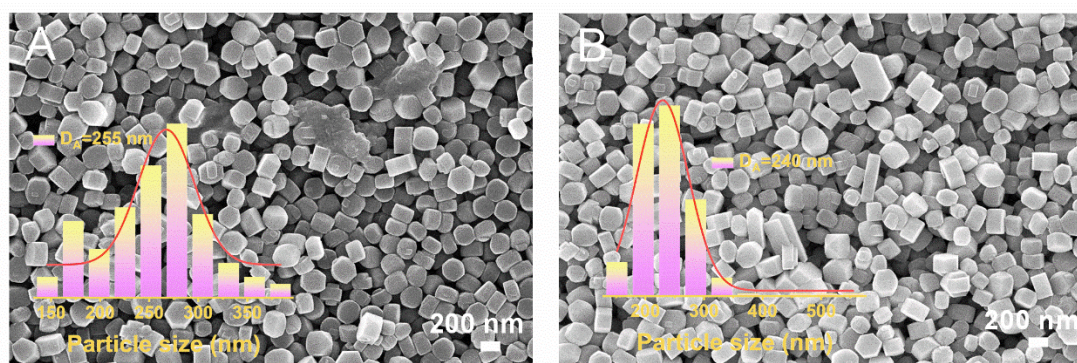

**Fig. S5** SEM images of S-1 zeolite samples derived from mechanical stirring of 12 h (A) and 24 h (B) under hydrothermal conditions (170 °C, 2 h). The insets in A and B are crystal size distribution diagrams.

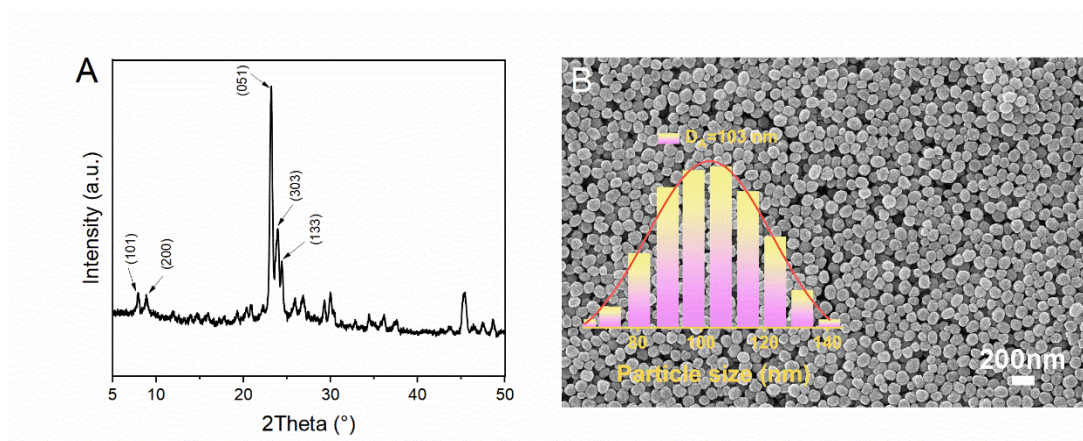

**Fig. S6** XRD pattern (A) and SEM image (B) of S-1 zeolite sample derived from MLF reactor for a mixing time of 10 min after static hydrothermal treatment at 90 °C. The inset in B is crystal size distribution diagram.

**Table S1.** Properties of the various S-1 zeolite samples.

| Samples                     | $S_{\text{BET}}^{\text{a}}$<br>( $\text{m}^2/\text{g}$ ) | $S_{\text{micro}}^{\text{a}}$<br>( $\text{m}^2/\text{g}$ ) | $V_{\text{total}}^{\text{b}}$<br>( $\text{cm}^3/\text{g}$ ) | $V_{\text{micro}}^{\text{c}}$<br>( $\text{cm}^3/\text{g}$ ) |
|-----------------------------|----------------------------------------------------------|------------------------------------------------------------|-------------------------------------------------------------|-------------------------------------------------------------|
| S-1-FR <sub>3min</sub> -2h  | 424                                                      | 352                                                        | 0.41                                                        | 0.16                                                        |
| S-1-FR <sub>3min</sub> -6h  | 364                                                      | 337                                                        | 0.28                                                        | 0.16                                                        |
| S-1-FR <sub>3min</sub> -12h | 370                                                      | 362                                                        | 0.22                                                        | 0.17                                                        |
| S-1-FR <sub>3min</sub> -24h | 373                                                      | 359                                                        | 0.19                                                        | 0.16                                                        |
| S-1-FR <sub>5min</sub> -2h  | 433                                                      | 359                                                        | 0.43                                                        | 0.16                                                        |
| S-1-FR <sub>5min</sub> -6h  | 401                                                      | 357                                                        | 0.27                                                        | 0.16                                                        |
| S-1-FR <sub>5min</sub> -12h | 388                                                      | 374                                                        | 0.19                                                        | 0.17                                                        |
| S-1-FR <sub>5min</sub> -24h | 400                                                      | 394                                                        | 0.21                                                        | 0.18                                                        |
| S-1-FR <sub>7min</sub> -2h  | 435                                                      | 394                                                        | 0.32                                                        | 0.17                                                        |
| S-1-FR <sub>7min</sub> -6h  | 436                                                      | 414                                                        | 0.23                                                        | 0.18                                                        |
| S-1-FR <sub>7min</sub> -12h | 407                                                      | 391                                                        | 0.23                                                        | 0.18                                                        |
| S-1-FR <sub>7min</sub> -24h | 424                                                      | 415                                                        | 0.21                                                        | 0.18                                                        |

<sup>a</sup> Determined by BET method. <sup>b</sup> Determined by Volume adsorbed at  $p/p_0 = 0.995$ . <sup>c</sup> Determined by t-plot method.
